# Supplementary material for: THADA Regulates the Organismal Balance between Energy Storage and Heat Production
Source: PubMed Central journal article supplement (PMC5392496; doi:10.1016/j.devcel.2017.03.016), 2017-04-10
Supplement: mmc1.pdf [file mmc1.pdf]

**Developmental Cell, Volume 41**

**Supplemental Information**

**THADA Regulates the Organismal Balance  
between Energy Storage and Heat Production**

**Alexandra Moraru, Gulcin Cakan-Akdogan, Katrin Strassburger, Matilda Males, Sandra Mueller, Markus Jabs, Michael Muelleder, Martin Frejno, Bart P. Braeckman, Markus Ralser, and Aurelio A. Teleman**

## Supplemental Information

### Inventory

#### 1. Supplemental Figures

- Figure S1. (Related to main Figure 1).
- Figure S2. (Related to main Figure 1).
- Figure S3. (Related to main Figure 1).
- Figure S4. (Related to main Figure 2).
- Figure S5. (Related to main Figure 4).

#### 2. Legends to Supplemental Figures

#### 3. Supplemental Tables

- Table S1. (Related to main Figure 2).
- Table S2. (Related to STAR Methods).

# Moraru et al. - Supplemental Figure 1

**A**

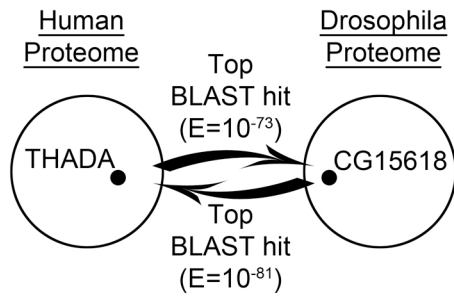

**B**

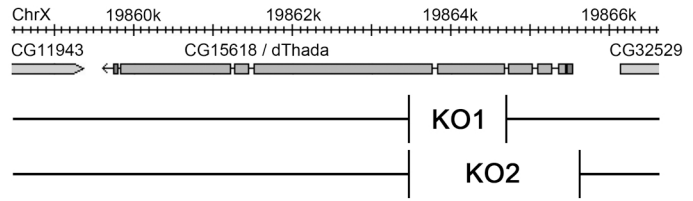

**C**

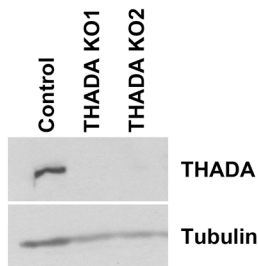

**D**

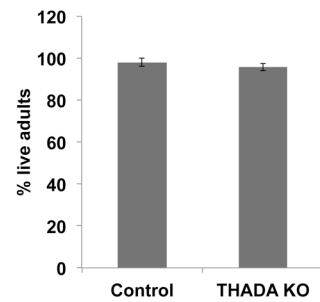

**E**

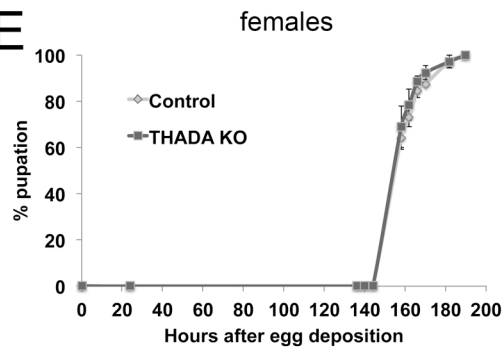

**E'**

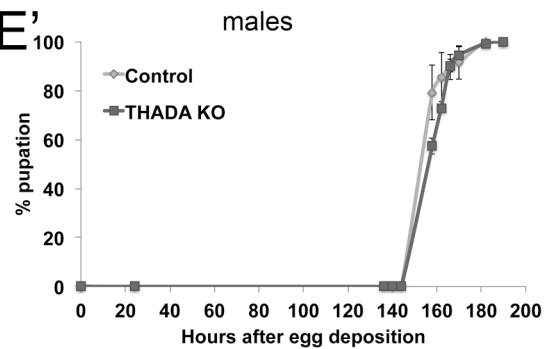

**F**

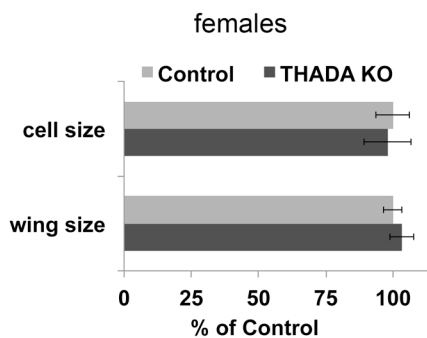

**F'**

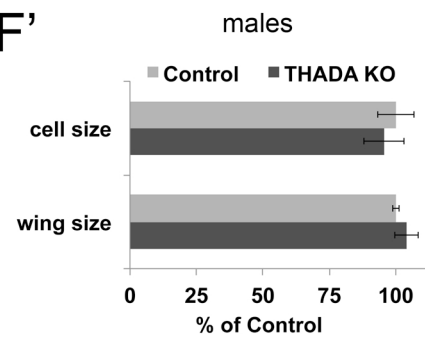

**G**

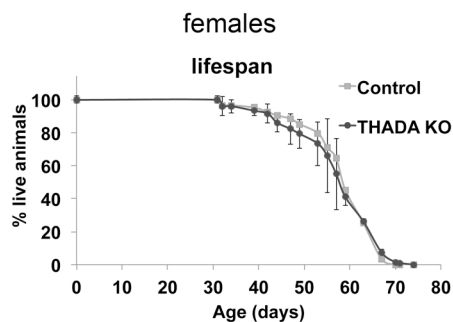

**G'**

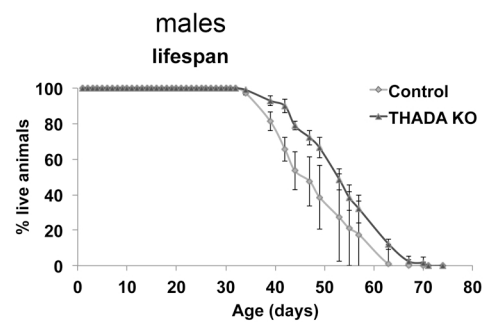

# Moraru et al. - Supplemental Figure 2

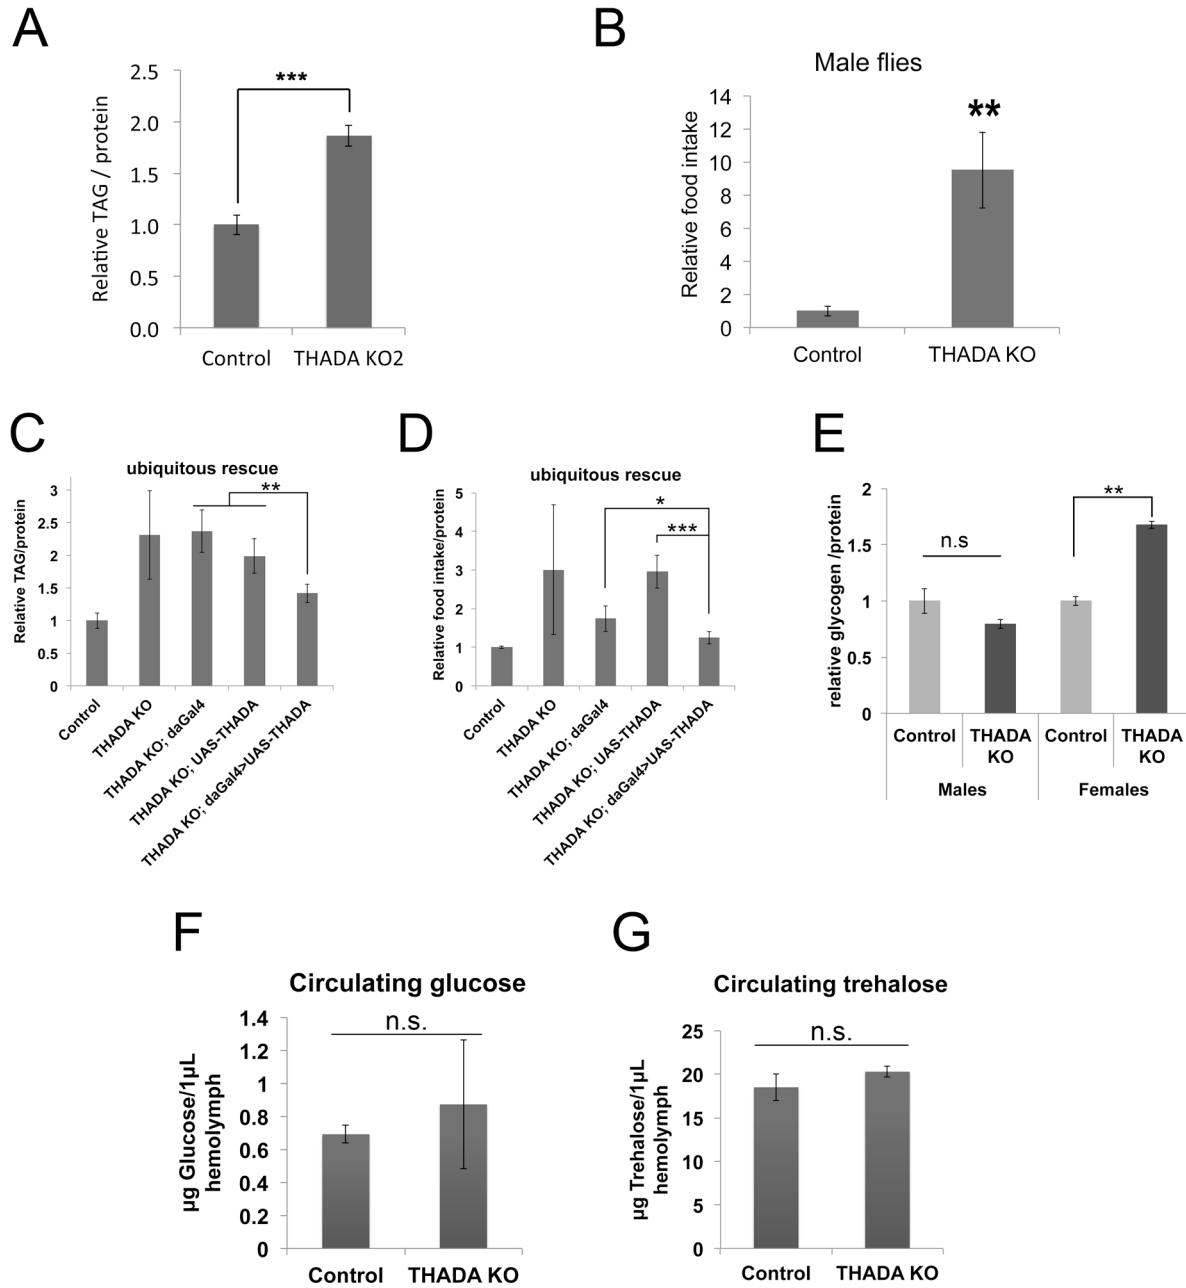

# Moraru et al. - Supplemental Figure 3

A

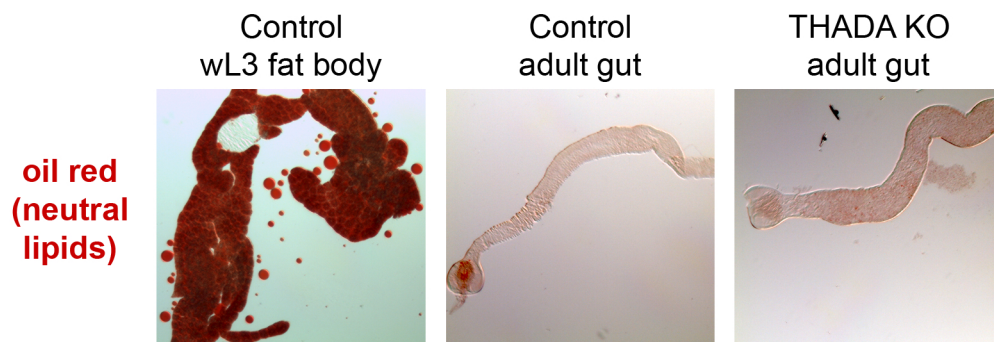

B

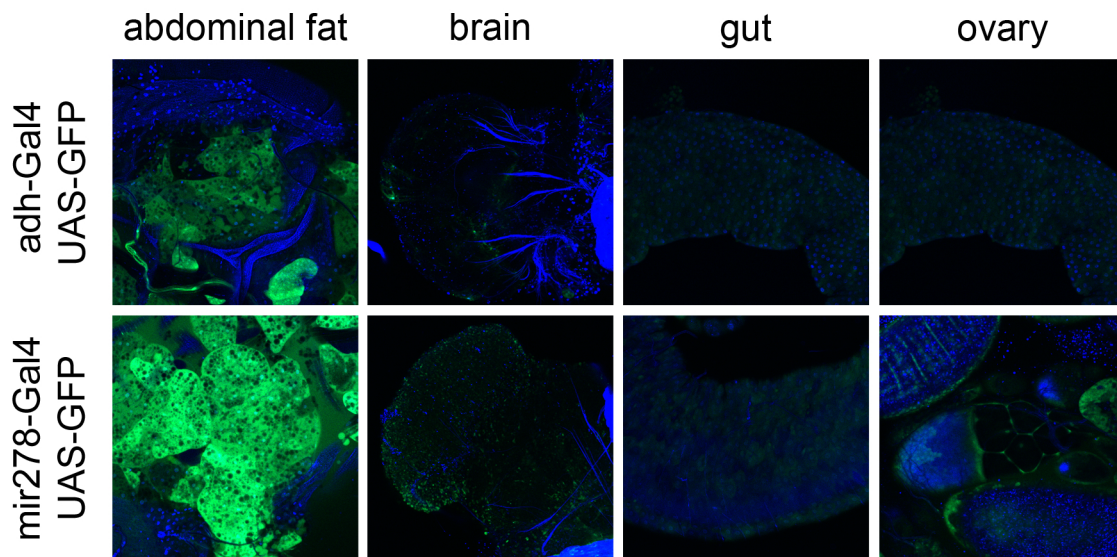

# Moraru et al. - Supplemental Figure 4

**A**

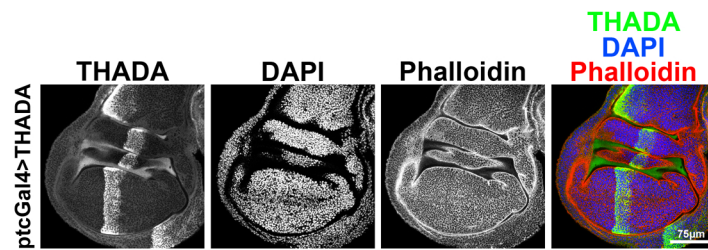

**B**

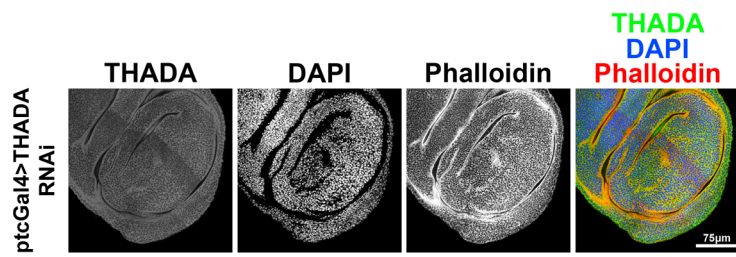

**C**

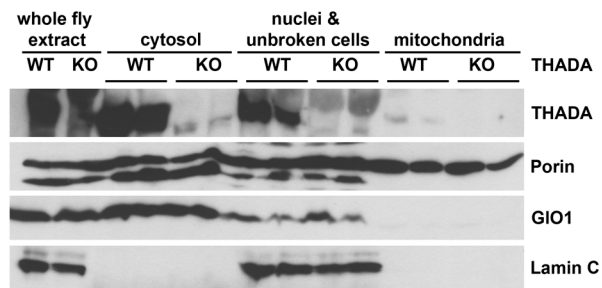

# Moraru et al. - Supplemental Figure 5

## A

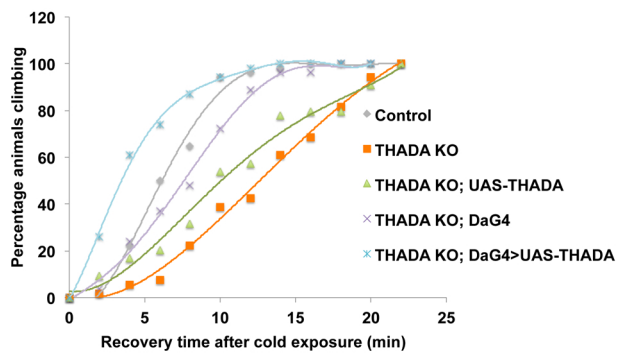

## B

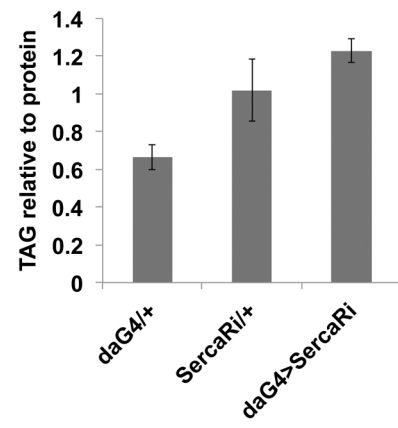

## Legends to Supplemental Figures

**Figure S1: *Drosophila THADA* knockout flies are viable. Related to Figure 1.**

**(A)** CG15618 is the *Drosophila* ortholog of THADA. BLAST search (using the Flybase BLAST server) of the *Drosophila* proteome using the protein sequence of human THADA (NCBI Reference Sequence NP\_071348.3) identifies CG15618 as the top hit, with an E value of  $10^{-73}$ . Conversely, a BLAST search of the human proteome using the protein sequence of *Drosophila* CG15618 identifies THADA as the top hit with an E value of  $10^{-81}$ , establishing an orthologous relationship between human THADA and *Drosophila* CG15618, which we henceforth refer to as *Drosophila* THADA.

**(B)** Schematic diagram of the *THADA/CG15618* genomic locus, indicating the knock-out regions.

**(C)** Anti-dTHADA antibody detects a band at the expected 220kDa size in control flies, but not in *THADA*<sup>KO1</sup> or *THADA*<sup>KO2</sup> flies.

**(D-F')** *THADA* knockout flies are viable (D), and have normal developmental timing (E-E') and size (F-F'). Sixty first-instar larvae were seeded per vial, and grown under controlled conditions. (D) Total number of eclosing adults was counted, and normalized to number of seeded larvae (n=3x60 animals). (E-E') Number of pupated females (E) or males (E') was quantified over time, represented as a percentage of total pupated animals (n=3x40 animals). (F-F') Total wing area and wing cell size (area per number of wing hairs) were measured and normalized to control animal values (n=8, representative of 3 experiments) for females (F) and males (F').



**(G-G')** *THADA*<sup>KO</sup> flies have normal longevity. Lifespan curves of *THADA*<sup>KO</sup> females (G) and males (G') are similar to those of controls. (n=4 x 35 to 55 adult females)

**Figure S2: *Drosophila THADA* knockout flies have metabolic defects.**

**Related to Figure 1.**

**(A)** *THADA*<sup>KO2</sup> animals, like *THADA*<sup>KO1</sup> animals, have strongly elevated total body triglyceride levels, normalized to total body protein content. (n=3x8 3-day old adult females).

**(B)** *THADA*<sup>KO</sup> males (like females, shown in Main Figure 1) are hyperphagic. Relative food intake in *THADA*<sup>KO</sup> adult male flies, quantified by transferring flies from normal food to food containing Acid Blue 9 for one hour, followed by homogenization and measurement of OD625. (n=3x9)

**(C-D)** Ubiquitous expression of *THADA* from a transgene rescues the elevated triglycerides (C) and the hyperphagia (D) of *THADA*<sup>KO</sup> flies. (C) Total body triglycerides normalize to total body protein. (D) Food intake quantified as in Main Figure 1B. Expression of *THADA* was achieved using the GAL4/UAS bipartite system whereby the GAL4 transcription factor activates expression downstream of a *UAS* enhancer element. Parental genotypes containing the *THADA* mutation and either the *GAL4* or *UAS-THADA* do not express *THADA*, whereas the combination (*THADA*<sup>KO</sup>; *daughterless(da)-GAL4>UAS-THADA*) restores *THADA* expression. Note that the hyperphagia phenotype (D) is more variable than the obesity phenotype (C) since the

hyperphagia phenotype in some genetic backgrounds (e.g. *THADA*<sup>KO</sup>; *da-GAL4*) is not strong. (n=3x9 adults females per genotype)

**(E)** *THADA*<sup>KO</sup> females, but not males, have elevated glycogen levels. Total body glycogen levels in adult flies, normalized to total body protein. (n=3x8 adult flies per genotype)

**(F-G)** *THADA*<sup>KO</sup> animals do not have significantly altered circulating sugar levels. Circulating glucose (F) and trehalose (G) were determined from hemolymph isolated from wandering third instar female larvae. (n=3x8)

Error bars: Std. dev. \*p<0.05, \*\*p<0.01, \*\*\*p<0.001, “n.s.” p=0.47(F) or 0.13(G) by student t-test.

**Figure S3: THADA knockout flies do not have ectopic lipid deposition.**

**Related to Figure 1.**

**(A)** Oil Red staining for neutral lipids reveals little to no ectopic lipid deposition in *THADA*<sup>KO</sup> guts, a typical organ for ectopic lipid deposition in *Drosophila*.

**(B)** *Adh-GAL4* and *mir278-GAL4* are predominantly expressed in the adult fat body. Expression of the two GAL4 drivers revealed by crossing to *UAS-GFP* and imaging GFP fluorescence. Images of all tissues for one genotype were taken with the same laser and confocal settings.

**Figure S4: Specificity controls for anti-THADA antibody and lack of strong THADA signal in mitochondrial preparations. Related to Figure 2.**

**(A-B)** Control immunostainings of wing discs with  $\alpha$ -dTHADA antibody show that it specifically detects THADA protein. Wing imaginal discs expressing either *UAS-THADA* to overexpress *THADA* (A) or *THADA RNAi* to reduce expression of endogenous *THADA* (B) in a central stripe of the wing disc using the *patched-Gal4* driver.

**(C)** Only very low levels of THADA protein are found in preparations of crude mitochondria from flies. Porin serves as a control for mitochondria, Lamin C for nuclei, and Glyoxalase I for cytosol.

**Figure S5: Support to main Figure 4.**

**(A)** Sensitivity to cold exposure of *THADA*<sup>KO</sup> flies is rescued by ubiquitous expression of *THADA* from a UAS transgene. Adult flies were kept for 5 hours at 4°C to immobilize them. Recovery at room temperature was monitored as the ability to resume climbing. Parental genotypes containing the *THADA* mutation and either the ubiquitous *daughterless-GAL4* (*DaG4*) or *UAS-THADA* do not express THADA, whereas the combination (*THADA*<sup>KO</sup>; *DaGAL4*>*UAS-THADA*) restores *THADA* expression. Sensitivity curve of the rescued animals is significantly different compared to *THADA*<sup>KO</sup>; *DaG4* animals (Log-rank test p-score <0.0001). (n=3x18 per genotype)

**(B)** Ubiquitous expression of SERCA-RNAi in control flies does not reduce their total body triglyceride levels. Total body triglyceride levels normalized to

total body protein for adult female flies with a mild, ubiquitous SERCA knockdown using *daughterless-GAL4* (*daG4>SercaRi*), compared to the parental control genotypes carrying either the GAL4 only or the *UAS-SERCA-RNAi* only. (Error bars: Std. Dev. n=3 x 8).

### **Supplemental Tables**

#### **Table S1: THADA interacting proteins. (Related to Figure 2).**

Available as an excel sheet for download from the website.

#### **Table S2: Cloning and gene expression knockdown Oligonucleotides. (Related to STAR Methods)**

| <b>Oligo Name</b> | <b>Purpose</b>                                                | <b>Sequence</b>                   |
|-------------------|---------------------------------------------------------------|-----------------------------------|
| GCA001            | Clone upstream flank for THADA knockout #1 construct (AvrII)  | ccggcctaggGGGCGTTGTCGAGGATGTG     |
| GCA004            | Clone upstream flank for THADA knockout #1 construct (AclI)   | ccggggcgcgccGCATTGTGCGCAGCTATCAT  |
| GCA005            | Clone downstream flank for THADA knockout #1 construct (NheI) | ccgggctagcGCCGCCAGGTCATTGAGGAG    |
| GCA008            | Clone downstream flank for THADA knockout #1 construct (NotI) | ccgggcgggccgcGCTGTGCGCATGGAGAGATC |
| OAM099            | clone downstream flank                                        | TATGGGCGCACTGGGTTAGCAGA           |

|                  |                                              |                                                 |
|------------------|----------------------------------------------|-------------------------------------------------|
|                  | for THADA knockout #2                        |                                                 |
| OAM100           | clone downstream flank for THADA knockout #2 | actagtTTCAGATGGGCGAAGAAATCGAT                   |
| GCA360           | dsRNA1 against THADA CG15618                 | ggcctaatacgactcactatagggaggATCCGCAATCCTGACAGAAC |
| GCA 361          | dsRNA1 against THADA CG15618                 | ggcctaatacgactcactatagggaggGTTGGCGGACACGAAGAC   |
| GCA362           | dsRNA2 against THADA CG15618                 | ggcctaatacgactcactatagggaggGGGCCAGGAACTGTATGA   |
| GCA363           | dsRNA2 against THADA CG15618                 | ggcctaatacgactcactatagggaggAGCCTGATGGCGAAGATA   |
| OAM155           | part 1 hThada upper                          | agatctCCGACGTGCACGAGTGACTACT                    |
| OAM156           | part 1 hThada lower                          | ACTCCTGGAGACTGGCTGTTAA                          |
| OAM157           | part 2 hThada upper                          | GGGAGAACCTCGTGTCTGATGC                          |
| OAM158           | part 2 hThada lower                          | GCACTGCCCAGACCGGTGATGT                          |
| OAM159           | part 3 hThada upper                          | AGATACGCGCCTGGGAGAAAAT                          |
| OAM160           | part 3 hThada lower                          | gcggccgcCCCCATCCCAATCCCCCAGATT                  |
| THADA siRNA pool | Dharmacon                                    | Cat#D-032022                                    |
